# Supplementary material
Source: Elsevier journal article supplement (https://www.sciencedirect.com/science/article/pii/S0212656718304153)
Supplement: mmc1 [file S0212656718304153:mmc1.docx]

**ANEXO: REVISIÓN DE CRITERIOS TIDIER[[1]](#footnote-1)**

**1.- Heurísticos y sesgos de Disponibilidad**

| **AUTOR** | **AÑO** | **DESCRIPCIÓN** | **POR QUÉ** | **QUÉ Y CÓMO**  (MATERIALES Y PROCEDIMIENTOS) | **QUIÉN** | **DONDE** | **CUANDO Y CUANTO** | **ADAPTACIONES[[2]](#footnote-2)** | **EN QUE GRADO SE REALIZÓ LO PREVISTO [[3]](#footnote-3)** |
| --- | --- | --- | --- | --- | --- | --- | --- | --- | --- |
| Mamede | 2014 | Investigar el papel de los “ Hallazgos que llaman la Atención” ( Salient Distracting Features o SDF) | Los errores diagnósticos son debidos a razonamiento defectuoso más que a falta de conocimiento | Materiales  12 casos clínicos basados en pacientes reales preparados por especialistas de > 15 años de experiencia ( 6 simples y 6 complejos)  Cada caso tenía 3 versiones: sin SDF, con SDF al principio y con SDF al final.  Procedimiento: cada participante diagnosticó los 12 casos presentados en 3 formatos diferentes, y tras ello se les volvió a presentar individualmente para conocer la confianza en su diagnóstico y el tiempo empleado.  El diagnóstico fue evaluado como correcto, parcialmente correcto o incorrecto | Invitación a participar voluntariamente a los 98 residentes de Medicina Interna que participaban en un programa formativo, de los que participaron 72 (50% de 1ª año y 50% de 2ª año) | Erasmus Medical Centre ( Universidad Erasmus, Rotterdam) | El número total de casos analizado fue de 144 | - | - |
| Peipins | 2015 | Explorar los antecedentes cognitivos y emocionales del riesgo percibido de cáncer de ovario, y evaluar la relación entre percepción de riesgo y riesgo real | Los heurísticos pueden ser incorporados en la evaluación de la percepción de riesgo de cáncer | Materiales  Una encuesta sobre percepción de riesgo de cáncer de ovario y cribado de cáncer entre mujeres con riesgo muy alto, alto o medio de cáncer de ovario.  Procedimiento  Análisis de la relación obtenida entre características personales y cognitivas, y los constructos emocionales y el riesgo percibido de cáncer de ovario | 2524 mujeres que aceptaron realizar una entrevista de 35 minutos de las 3307 elegidas aleatoriamente de las que cumplen criterios de eligibilidad de las 55887 enroladas en HFHS | Henry Ford Health System Foundation (HFHS) | 2011 observaciones finales | - | - |
| Elstad | 2015 | Comparar la percepción de beneficios y riesgos de 2 pruebas de cribados que varían en dichos beneficios y riesgos | Recordar con más facilidad los beneficios de una prueba de cribado, podría implicar una mayor percepción de beneficios del cribado | Materiales:  Cuestionario en papel sobre 2 viñetas de casos de pacientes hipotéticos de 70 años a los que se oferta cribado de cáncer de próstata y colon  Procedimiento:  Se preguntó respecto a la probabilidad percibida de daño, y la probabilidad estimada de prolongación de la vida en 100 personas sanas.  Se analizaron beneficios y daños, la facilidad de recordarlo y la magnitud de beneficio ( o daño) y la diferencia entre beneficios y daños. | 126 de 155 clínicos (86%) que incluían profesionales de medicina, enfermería, asistentes médicos (Physician Assistant) u osteópatas | Centros de Atención Primaria afiliados a la Universidad de Carolina del Norte | 126 cuestionarios | - | - |
| Cavazos | 2008 | Identificar y describir barreras para aplicar guías de prescripción de AINES | El uso de heurísticos lleva a desviarse de la aplicación de las guías de práctica | Materiales:  Entrevistas en profundidad de preguntas abiertas a partir de un guion estructurado  Procedimientos:  Grabación de entrevistas y análisis de las transcripciones empleando métodos comparativos continuos de análisis cualitativo | 25 médicos de diferentes especialidades | Diferentes centros de Houston ( centros públicos, organización de Veteranos, hospitales privados, atención ambulatoria) | Transcripción de las 225 entrevistas | - | - |
| Dale | 2006 | Evaluar si un evento reciente negativo podría influir en la decisión de los cirujanos vasculares en simulaciones de tratamiento de Aneurisma aórtica abdominal | Las reacciones emocionales al riesgo y la incertidumbre puede hacer divergir la decisión clínica de las guías recomendadas | Materiales.  Simulación a través de ordenador del inflado de balón con riesgo de estallido  Cuestionarios dividido en 2 partes procedente del 3 cuestionarios validados (STAI-S, IUS, DOSPERT)  Procedimientos.  Aplicación de 1ª parte de cuestionario.  Asignación aleatoria de los participantes a uno de las dos condiciones experimentales ( con o sin estallido)  Aplicación 2ª parte de cuestionario | 81 participantes de ambas conferencias | Conferencias de la Society for Vascular Surgery y Midwestern Vascular Surgery Society de Cirujanos vasculares | 82 simulaciones en dos condiciones | - | - |
| **Stiegler** | **2012** | **Identificar qué tipo de errores cognitivos son más frecuentes en Anestesiología** | **Los errores cognitivos pueden generar un diagnóstico y /o tratamiento incorrecto** | **Materiales**  **Creación de un catálogo de errores cognitivos**  **Simulación formativa en SimMan simulator**  **Procedimiento**  **Valoración de los errores cognitivos realizados durante la actividad simulada**  **Evaluación por dos expertos** | **32 residentes de Anestesiología reclutados según disponibilidad de un total de 77 médicos** | **Escuela de Medicina de Irvine ( California)** | **Identificación de 9 tipos de errores cognitivos** | **-** | **-** |
| Armstrong | 2003 | Describir las características de las mujeres que son “adoptadores precoces”  (“Early adopters”) | La teoría de la Difusión de Innovaciones podría aportar información sobre las razones por las que mujeres que participan en práctica de consejo genético deciden realizarse una prueba | Material  Cuestionario en 3 partes  Procedimiento  Envío de cuestionarios | 229 de 406 mujeres que participaron en el BCREP | University of Pennsylvania Breast and Ovarian Cancer  Risk Evaluation Program (BCREP) | 229 cuestionarios | - | - |
| Mamede | 2010 | Experiencias recientes con determinados problemas clínicos podrían generar el uso de un heurístico de disponibilidad en casos similares | Los errores diagnósticos han sido atribuidos en muchas ocasiones a fallos en el razonamiento cognitivo, incluido el uso de heurísticos | Materiales.  16 casos clínicos basados en casos reales escritos por expertos en Medicina Interna  Procedimientos  En la Fase 1 se solicitaba establecer la probabilidad de la certeza del diagnóstico propuesto en 4 casos aleatoriamente asignados a los dos grupos  En La Fase 2 cada participante debía establecer el diagnóstico correcto de 8 casos nuevos tan rápido como fuera posible, la mitad de los cuales eran similares a casos de la fase 1 de cada grupo  En la Fase 3 se interrogaba sobre 4 casos a cada grupo similares a los de Fase 1 recomendando realizar razonamiento reflexivo | 36 de los 42 residentes de medicina interna (85,7%): 18 de 1º año y 18 de 2º año | Erasmus Medical Centre de la Facultad de Medicina de la Universidad Erasmus de Rotterdam | Análisis de la decisión sobre los 18 casos revisados por cada uno de los 36 residentes | - | - |
| Shen | 2009 | Evaluar la influencia del contexto en el proceso de decisión en obstetricia | Las preferencias en materia de decisión en condiciones de incertidumbre ( como las existentes en obstetricia) son maleables y tienden a construirse durante el propio proceso | Materiales  5 casos hipotéticos ( el caso de prueba y 4 de “background”)  Cada caso ofrece solo 2 alternativas de tratamiento  Procedimientos  Los casos fueron evaluados en el marco de 2 condiciones experimentales ( background patológico, background fisiológico) o de 2 condiciones control( , patológico o fisiológico) | 429 de los 1247 obstetras a los que se envió el cuestionario de diferentes grados de experiencia | Lista de correo de especialistas en Obstetricia de una sociedad profesional de Israel | Análisis de los 429 resoluciones de casos presentadas | - | - |
| Choudhry | 2006 | Cuantificar las experiencias previas de efectos adversos en pacientes que toman anticoagulantes por parte de los médicos | Los médicos sobrestiman el riesgo de sangrado en pacientes con warfarina en función de sus experiencias previas | Materiales  Base de datos que incluye la información sobre una cohorte retrospectiva de 3921 pacientes >66 años admitidos en un hospital con fibrilación auricular y que sufrieron episodios de sangrado digestivo o cerebral tras tratamiento con warfarina en los 120 días previos | 530 médicos | Ontario | 3120 casos de pacientes > 66 años (con médico identificado), admitidos por fibrilación auricular en un hospital canadiense entre 1994 y 2002 y que sufrieron episodios de sangrado digestivo o cerebral tras tratamiento con warfarina en los 120 días previos | - | - |
| Freymuth | 2004 | Evaluar como estructuran la información los médicos ( anecdótica versus tasa-base) | La ausencia de información estadística completa, la dependencia de experiencias pasadas y la anulación emocional se encuentran entre las cusas del error en el proceso de decisión | Materiales  2 Viñetas de enfermedades supuestas  Procedimientos  Asignación aleatoria de los participantes a 1 de las 12 condiciones | 317 estudiantes | Midwestern University | Respuestas de los 317 participantes | - | - |
| Facione | 2006 | Evaluar las razones por las que las mujeres con sospecha de cáncer de mama buscan diagnóstico o retrasan la decisión de hacerlo | La interacción de los dos sistemas ( 1 y 2) de decisión puede influir la elección de retrasar o solicitar atención | Materiales  Entrevistas en profundidad  Procedimiento  Investigación analítica protocolizada basada en el análisis del discurso | 28 de 39 mujeres sintomáticas (72%) | Área de San Francisco Bay | 28 entrevistas | - | - |
| Peay | 1997 | Investigar áreas de congruencia y discrepancia entre médicos y pacientes respecto a la urgencia de la necesidad de buscar atención | La valoración de médicos y pacientes respecto a la necesidad de acudir a consulta ante un determinado problema es diferente | Materiales.  Cuestionarios sobre 35 síntomas frecuentes  Procedimientos  Cumplimentación de un cuestionario por un ayudante de investigación | 176 pacientes de un médico general comunitario (71%)  337 estudiantes de psicología ( “potenciales pacientes”)  66 médicos generales que participaban en una actividad formativa (79,5%) | Australia | 152 cuestionarios | - | Los datos de registro fueron incompletos |
| Ubel | 2001 | Evaluar el efecto de testimonios, tanto positivos como negativos, sobre una elección clínica | Experiencias testimoniales de pacientes pueden anular la información estadística | Materiales  Cuestionarios aportando información estadística y testimonial  Procedimientos  Los participantes fueron aleatorizados en 4 versiones de los cuestionarios con diferente composición de la información | 537 participantes en Jurados ( Estudio 1) y 593 ( Estudio 2) | Miembros del jurado de la corte de Filadelfia | 1130 cuestionarios | - | - |
| Fraenkel | 2005 | Investigar los factores que influyen en la decisión de los pacientes a la hora de considerar un tratamiento para la hepatitis C | Las decisiones complejas implican la comparación de alternativas valorando pros y contras ( trade-off) | Materiales  Grupos focales  Procedimientos  Análisis sistemático de la información por parte de 2 evaluadores expertos | 40 pacientes | Pacientes consecutivos atendidos en consultas ambulatorias de hepatología del Yale and the Veterans Administration Connecticut Healthcare  System | Resultados de 8 Grupos Focales | - | - |
| Farrell | 2002 | Examinar el proceso de decisión tras la realización de Counseling para la determinación del PSA | La percepción del riesgo puede ser influida por la forma de enmarcar la información ( Framing) | Materiales  Entrevistas de 30 a 60 minutos con entrevistadores expertos  Procedimientos  Grabación y análisis de la información | 40 personas ( 16 captados a través de anuncios y 24 a través de correo) | Reclutamiento poblacional a través de anuncios y correos dirigidos a 200 pacientes aleatoriamente elegidos de centros de Atención Primaria en Michigan | 40 entrevistas | - | - |
| Brinckman | 2009 | Entender por qué razones deciden iniciar tratamiento los padres de niños con Síndrome de Déficit de Atención e Hiperactividad (SDAH) | Se desconocen los factores que determinan la decisión de tratamiento en padres de pacientes con SDAH | Material  Cuestionario de cribado  Grupo focal  Procedimientos  Grabación y análisis | 52 padres de pacientes con SDAH | Cincinnati/Northern Kentucky | 12 Grupos Focales | - | - |
| **Cioffi** | **2001** | **Analizar el empleo de experiencias pasadas en el proceso de decisión en urgencias, y cómo se utilizan para construir heurísticos** | **El uso de las experiencias pasadas a través de heurísticos es esperable que se emplee en el proceso de decisión clínica** | **Materiales:**  **Entrevistas no estructuradas de 45 minutos de duración**  **Procedimiento**  **Grabación y transcripción extrayendo referencias a experiencias previas y categorizándolas en los diferentes heurísticos** | **32 enfermeras con al menos 5 años de experiencia** | **Ritchmond ( Australia)** | **Entrevistas a personal de enfermería responsables de 4 salas en hospital docente y 3 de un hospital periférico de un Área de Servicios de salud** | **-** | **-** |
| Dillard | 2010 | Evaluar el efecto de introducir una narrativa en un mensaje sobre cribado de cáncer de colon | Es escasamente conocido el efecto de la introducción de narrativas en los procesos de decisión clínica | Materiales  Mensaje sobre cribado con o sin narrativa incorporada  Procedimientos  Asignación aleatoria a recibir mensaje con o sin narrativa y sobre colonoscopia o colonoscopia virtual | 1533 participantes de 5126 que accedieron a la página y permanecieron al menos 30 segundos | Participantes de la empresa de encuestas por internet Survey Sampling International (SSI), | Análisis de 1533 respuestas | - | - |
| **Kenen** | **2003** | **Evaluar si las personas con antecedentes familiares de cáncer de ovario y mama (HBCO) que buscan consejo genético son influidas por historias familiares y el uso de heurísticos a la hora de interpretar la información** | **La valoración del riesgo de enfermedad ( cáncer) puede estar determinado por el uso de heurísticos** | **Material**  **Entrevistas en profundidad**  **Observación clínica durante 5 meses**  **Procedimientos**  **Trascripción y lecturas reiteradas de las entrevistas** | **Muestra intencional de 21 mujeres de 32 contactadas** | **Mujeres que acuden a unidades de genética por vez primera en un centro de investigación clínica de Reino Unido** | **21 entrevistas** | **-** | **-** |
| Poses | 1991 | Evaluar los efectos del inapropiado uso de heurísticos y sesgos en el juicio médico sobre la probabilidad de bacteriemia | El uso inapropiado de heurísticos de disponibilidad y valor ( value bias) influye en el juicio clínico | Materiales  Cultivos sanguíneos  Cuestionario  Entrevista en caso de no cumplimentarlo  Procedimientos  Realización de cultivos de pacientes ingresados.  Recolección de estimación de probabilidad de bacteriemia y experiencias recordadas de eventos similares  Revisión de registros clínicos | Médicos que atienden en primer lugar a los pacientes | 227 pacientes ingresados en hospitales americanos | Datos procedentes de 277 pacientes ingresados | - | - |
| Volandes | 2009 | Evaluar el efecto de un instrumento de apoyo a la decisión por video en las preferencias de futura atención médica para pacientes ancianos con demencia avanzada | El respeto a las preferencias de los pacientes es un componente clave de la atención de calidad en personas de edad avanzada | Materiales  Elaboración de narrativas y videos  Procedimientos  Ensayo clínico aleatorizado: Asignación aleatoria de los pacientes en 2 grupos: narrativa verbal o a través de video | Muestra de conveniencia de 200 personas > 65 años | 4 clínicas de Atención Primaria de centros académicos de Boston  (Massachussets) | Ensayo realizado entre septiembre de 2007 y mayo de 2008 | - | - |
| **Williams** | **2009** | **Evaluar cómo afecta el pensamiento irracional a la adherencia al tratamiento de pacientes con nefropatía diabética** | **El pensamiento irracional desempeña un peso relevante en la adherencia al tratamiento** | **Materiales**  **Entrevistas en profundidad de 45-90 minutos**  **Procedimiento**  **Registro, transcripción y análisis** | **Muestra de conveniencia de 23 pacientes reclutados de 43 asistentes a la clínica interesados a participar en el estudio** | **Clínicas ambulatorias de Nefrología en Australia** | **23 registros finales** | **-** | **-** |
| Winterbottom | 2012 | Comparar el impacto de historias de pacientes y médicos en modalidades hipotéticas de elección de diálisis | Existen dudas sobre si la descripción de narrativas ayuda o dificulta las decisiones clínicas | Materiales  Información online sobre diálisis  Simulación mediante actores  Procedimientos  Lectura de la información. Distribución en grupo control o de intervención  (Lectura de transcripción o visionado de video)  Cumplimentación de cuestionario final | 1694 participantes:  578 de 784 participantes ( estudio 1) y 1116 de 1722 ( estudio 2) | Estudiantes de la Universidad de Leeds | Realización de 2 estudios con diferentes formas de presentación de la información | - | - |
| Cioffi | 1998 | Evaluar el proceso de decisión de triaje incluyendo la influencia de la experiencia y la incertidumbre | La experiencia y la incertidumbre representan un elemento relevante en el contexto de los procesos de triaje | Materiales  6 casos de triaje basados en casos reales  Uso de protocolos verbales  Procedimiento  Entrevistas individuales registrando protocolos verbales para las 6 condiciones exploradas | Análisis de 119 protocolos procedentes de 20 enfermeras voluntarias | Hospitales de distrito y universitarios de Australia | Registros procedentes de 12 profesionales de enfermería experimentadas y 8 menos experimentadas | - | - |
| Heath | 1991 | Evaluar el rol de los heurísticos en el proceso de evaluación del riesgo por VIH | El juicio sobre el riesgo de exposición al VIH podría estar influido por el uso de heurísticos | Materiales  Cuestionario  Procedimiento  Explotación de la información | 331 registros de 133 médico y 198 residentes | Diversas especialidades de un Hospital en Chicago ( Estados Unidos) |  |  |  |

**2.- Heurísticos y sesgos de Anclaje y ajuste**

| **AUTOR** | **AÑO** | **DESCRIPCIÓN** | **POR QUÉ** | **QUÉ Y CÓMO**  (MATERIALES Y PROCEDIMIENTOS) | **QUIÉN** | **DONDE** | **CUANDO Y CUANTO** | **ADAPTACIONES** | **EN QUE GRADO SE REALIZÓ LO PREVISTO** |
| --- | --- | --- | --- | --- | --- | --- | --- | --- | --- |
| Kremer | 2002 | Revisión del uso de heurísticos a través del análisis de reclamaciones de la base de datos de la AANA Foundation | La necesidad de describir los tipos de errores cognitivos que generan resultados adversos en anestesia | Materiales:  1.Reclamaciones de la base de datos que cumplen criterios de inclusión.  2.Instrumento de medida diseñado ad hoc  Procedimiento:  Fase 0. Pilotaje  Fase 1. Examen de los ítems del instrumento en 84 reclamaciones  Fase 2. Análisis de la recreación de cada uno de los 133 casos que cumple criterios de inclusión  Valoración por parte de los evaluadores de las diferentes fases del proceso: preinducción, monitorización, condiciones previas, fundamentos de la demanda, posibilidad de haber sido evitado, adecuación de la anestesia | Reclamaciones obtenidas de la atención clínica prestada por profesionales de la AANA  Análisis de las mismas por 8 miembros expertos de la CRNA | Saint Paul Company | De todas las reclamaciones por responsabilidad contra la AANA se revisaron las 84 que cumplían criterios de inclusión | - | Imposibilidad de utilizar información clínica disponible en 5 de los 13 casos de Fase 2 |
| Paine | 2016 | Evaluar si la exposición a un modelo previo de  DT-LVAD crea un efecto anclaje | La implantación de un corazón artificial parcial es una decisión sensible a las preferencias individuales donde los heurísticos pueden jugar un papel relevante | Materiales:  Presentación de videos informativos a cada grupo  Procedimiento.  Evaluación mediante escala Likert de la decisión sobre su uso (  Tras el visionado cada participante valoraba en una escala Likert su grado de acuerdo respecto a la propuesta de implantación del aparato) | Participantes >18 años americanos reclutados del Amazon M Turk | Internet | Se analizaron al menos 487 cuestionarios (252 en grupo intervención y 235 en control). | - | Previamente se estimó necesario disponer de al menos 248 respuestas válidas por cada grupo |
| Leblanc | 2002 | Investigar si la influencia del diagnóstico puede sesgar la interpretación de información clínica | La consideración de una hipótesis diagnóstica puede influir en la valoración de los hallazgos clínicos observados | Materiales:  10 fotografías obtenidas de bibliografía representativas de determinados diagnósticos  Breve resumen clínico de cada caso  Procedimiento:  Para cada escenario se presentó la fotografía con una breve descripción del caso clínico y el diagnóstico tentativo  Para cada uno debían aportar los principales hallazgos, el diagnóstico y la probabilidad de que el diagnóstico propuesto fuera correcto  Tras presentar 2 escenarios comunes, los 8 restantes se dividieron en 2 grupos de 4 de forma aleatoria.  Los 10 escenarios fueron distribuidos aleatoriamente en 2 grupos (A y B). La mitad de los participantes fue sesgado hacia el diagnóstico correcto o hacia el diagnóstico alternativo en cada grupo. | 20 estudiantes y 20 residentes de McMaster University, voluntarios con cierto nivel de experiencia | Laboratorios de Mc Master University ( Canadá) | Revisión de 10 casos distribuidos en dos grupos por parte de 20 estudiantes y 20 residentes | - | - |
| Woodward | 2009 | Examinar los efectos de potenciales sesgos en el diagnóstico diferencial entre Trastorno Límite de la Personalidad y Síndrome de Estrés Postraumático | La presentación de ciertos escenarios clínicos podrían producir un anclaje al mismo en el proceso diagnóstico | Material:  4 “viñetas” obtenidas de la literatura que incluían síntomas de ambos diagnósticos  Procedimiento:  Envío postal de cuestionario que incluía aleatoriamente uno de las 4 “viñetas”  Cumplimentación del Diagnóstico de cada caso | 507 miembros de la NYSPA elegidos aleatoriamente de los que respondieron el 23.5%, con más de 19 años de experiencia media | Encuesta postal | 27 diagnósticos reportados | Adaptación de las viñetas originales para el estudio | - |
| Lau | 2007 | Evaluar si se emplean sesgos de anclaje, orden,exposición y refuerzo mientras se recupera información | El uso de ciertos heurísticos puede sesgar e influir en la forma en que se interpreta la evidencia obtenida de fuentes de información | *Análisis retrospectivo:*  Materiales:  8 escenarios clínicos  Procedimiento: cada clínico respondió preguntas sobre cada escenario presentado en orden aleatorio, tras lo cual se le solicitaba que encontrara evidencia documental de su respuesta  Cada sujeto registró sus respuestas antes y después de la búsqueda de información, la confianza en sus respuestas y en la información encontrada  *Experimento prospectivo:*  Materiales:  Cuestionario de 6 preguntas procedentes de consumidores de la salud  Procedimiento:  Registro de respuesta antes y después de buscar información y confianza en la misma | *Análisis Retrospectivo:* 75 clínicos (44 médicos,31 enfermeras)  *Experimento prospectivo:* muestra de conveniencia de 227 estudiantes de la Universidad | Laboratorio tecnológico de la universidad con acceso a bases de datos de información científica de la Universidad New South Wales | 1761 búsquedas (análisis retrospectivo) y 720 búsquedas (experimento prospectivo) | Pilotaje previo en el experimento prospectivo | - |
| Sibbald | 2011 | Evaluar la influencia del contexto clínico en la precisión diagnóstica y el uso de heurísticos | El aporte de información clínica a residentes podría incrementar la precisión diagnóstica | Materiales:  Simulador cardiopulmonar Harvey ©  Cuestionario de respuesta  Procedimiento:  Tras visionar un video introductorio cada residente fue expuesto aleatoriamente a uno de los 4 escenarios diagnósticos ( 6 en el caso de los residentes de 4º año), reportando su valoración  Evaluación del desempeño a través de check-list | 159 residentes de 2º,3º y 4º año de Medicina Interna invitados a participar por correo electrónico | Laboratorio de la Facultad de Medicina de la Universidad de Toronto | 73 residentes evaluados sin información sobre contexto clínico y 86 con información previa | - | - |
| Ogdie | 2012 | Explotación de factores contextuales y cognitivos del error diagnóstico a través de una intervención educacional | El contexto y el uso de heurísticos pueden influir en la comisión de errores diagnósticos | Material:  Intervención educativa sobre error diagnóstico y sesgo cognitivo en 3 fases, en la que tras una sesión informativa previa se realiza ejercicio de escritura reflexiva y sesión de discusión narrativa ( grupo focal) | 41 residentes de 2º año de Medicina Interna | Universidad de Pennsylvania | 41 narraciones y el resultado de la sesión narrativa de un grupo focal | Pilotaje previo con 5 residentes de medicina interna que no participaron en el estudio | - |
| Riva | 2011 | Investigar la influencia del anclaje en la valoración del dolor | El uso de heurísticos puede influir en la valoración del dolor | Material:  16 viñetas de ordenador sobre casos de pacientes atendidos en urgencia y evaluados respecto a la presencia de cefalea  Procedimiento:  Al grupo de experimentación se le solicitó valorar la intensidad del dolor antes y después de la presentación del autoreporte del paciente; en el grupo control se aporta la información simultáneamente | 423 participantes voluntarios:  223 grupo de intervención (58 médicos, 40 enfermeras, 85 estudiantes de medicina y 40 estudiantes de enfermería) y 200 en grupo control (40 médicos, 40 enfermeras, 80 estudiantes de medicina y 40 de enfermería) | Hospitales de 3 ciudades del Norte de Italia | Revisión de los resultados aportados por los 423 participantes | - | - |
| Brewer | 2007 | Evaluar el efecto de números de anclaje irrelevantes en elecciones sobre salud y el efecto del fomento de la precisión en la modulación del uso de anclaje | Se desconoce el efecto del anclaje en las elecciones | *Experimento 1.*  Materiales y procedimientos  Cuestionarios a partir de una viñeta sobre las que se realizan 3 preguntas solicitando juicios de probabilidad ( previa exposición a un número) y tratamiento presentados en un checklist  *Experimento 2.*  Materiales y procedimientos  Cuestionarios a partir de una viñeta ( con 2 adicionales) sobre las que se realizan 3 preguntas solicitando juicios sobre la probabilidad de sufrir una enfermedad ( previa exposición a un número) y tratamiento más adecuado  Aleatoriamente se asignaron a un grupo en que se incidía en la necesidad de realizar rendición de cuentas o no | Experimento 1  99 pacientes HIV +  Experimento 2:  191 respondientes de 461 médicos de familia a los que se envió carta (41%) | Experimento 1.  Pacientes HIV + reclutados en el Gay Men’s Health Crisis en  New York City  Experimento 2. Médicos de familia de la Iowa Medical Association | 99 cuestionarios ( experimento 1) y 191 cuestionarios ( Experimento 2) | - | - |

**3.- Heurísticos y sesgos de Exceso de confianza**

| **AUTOR** | **AÑO** | **DESCRIPCIÓN** | **POR QUÉ** | **QUÉ Y CÓMO**  (MATERIALES Y PROCEDIMIENTOS) | **QUIÉN** | **DONDE** | **CUANDO Y CUANTO** | **ADAPTACIONES** | **EN QUE GRADO SE REALIZÓ LO PREVISTO** |
| --- | --- | --- | --- | --- | --- | --- | --- | --- | --- |
| Wolfson | 2000 | Evaluar la precisión del juicio clínico respecto a la funcionalidad de los pacientes, la susceptibilidad de ese juicio a los sesgos y la relación entre confianza en el juicio y su precisión | El uso de heurísticos puede influir en el juicio clínico y la confianza en el mismo | Materiales  Cuestionarios  4 escenarios clínicos hipotéticos  Instrumento FIM/TM  Procedimiento  Realización de 4 experimentos con asignación aleatoria entre los participantes para evaluar el efecto de información potencialmente sesgada incluida en viñetas ( “casos clínicos teóricos”) de pacientes | 50 profesionales de Rehabilitación voluntarios | 3 centros médicos urbanos  Del estado de Washington ( Estados Unidos) | 50 casos | - | - |
| Christakis | 2000 | Describir la precisión pronóstica en pacientes terminales y evaluar los factores que la determinan | El error en el pronóstico puede tener consecuencias negativas para los pacientes | Materiales  Cuestionario administrado telefónicamente  Registros clínicos de los pacientes  Procedimientos  Contacto con el médico de referencia para realizar la encuesta telefónica tras realizarse el ingreso | 365 médicos que aportaron información de 504 pacientes ( todos los pacientes admitidos a lo largo de 130 días consecutivos) | 5 programas socio-sanitarios ambulatorios ( “Hospices”) | 468 registros | - | - |
| Graz | 2005 | Comparar las expectativas pronósticas de los cirujanos con los resultados reales alcanzados en pacientes con dolor lumbar | La precisión pronóstica es importante de cara a las decisiones terapéuticas | Materiales  Entrevistas a pacientes  Registros clínicos  Evaluación de la adecuación del tratamiento (UCLA)  Registro de expectativas de los pacientes  Procedimientos  Tras entrevistar a los pacientes atendidos se analizaron los registros clínicos y se evaluaron las expectativas de los cirujanos | 197 pacientes consecutivamente atendidos en una unidad de neurocirugía de la espalda | Hospital Universitario de Lausanne ( Suiza) | - | - | - |
| Lee | 2001 | Medir las expectativas de médicos y pacientes respecto al trasplante de células madre y correlacionarlas con los resultados obtenidos | Se desconoce la precisión con la que los médicos establecen el riesgo de intervenciones de trasplante | Materiales  Cuestionarios  Registro clínico  Procedimientos  Administración y análisis de cuestionarios  Revisión de información clínica | 313 pacientes trasplantados y sus médicos de referencia de 458 encuestas realizadas | Centro de trasplantes Estados Unidos | 313 casos | - | - |
| Poses | 1991 | Evaluar el efecto del “sesgo del ego” ( Ego bias), es decir la tendencia a sobreestimar sistemáticamente el pronóstico de los pacientes atendidos por uno mismo | El sesgo de Ego ( Ego bias) podría afectar el juicio pronóstico | Materiales  Entrevista  Registros clínicos APACHE II  Procedimientos  Tras el ingreso del paciente en la UCI un asistente de investigación registró la estimación de la probabilidad de supervivencia del paciente y de la media de pacientes ingresados | Valoración de 20 residentes y 4 médicos expertos de un total de 201 pacientes ingresados | Unidades de Cuidados Intensivos americanas | 201 casos | - | - |
| Crowley | 2013 | Medir la frecuencia y distribución de heurísticos y su efecto en el error diagnóstico en Anatomía Patológica | El uso de heurístico en el proceso diagnóstico es escasamente estudiado, desconociéndose su efecto en relación con el error | Material  Cuestionario y cartas a través de correo electrónico  Sistema a través de ordenador  20 casos de cada una de las 2 condiciones diagnósticas estudiadas  Procedimiento:  Invitación, visionado de video informativo, resolución de casos, análisis | 71 médicos con diversos grados de experiencia ( de residentes a expertos) voluntarios de la lista de correo de 2 Conferencias Médicas | 2 Conferencias médicas: American  Society for Clinical Pathology (ASCP y Canadian Academy of Pathology (USCAP) | 71 casos | -- | - |
| Meyer | 2013 | Evaluar la calibración diagnóstica ( relación entre la precisión diagnóstica y la confianza en el diagnóstico realizado) | Existe un escaso conocimiento de la correlación entre confianza en el diagnóstico realizado y la precisión del mismo | Materiales  4 casos viñeta elaborados de dificultad variable ( 42 fáciles, 2 difíciles) presentados en 4 fases sucesivas  Procedimientos  Los casos fueron presentados en formato web y divididos en 4 fases secuenciales: historia, exploración, pruebas diagnósticas y valoración final | 118 médicos internistas voluntarios | Comunidad virtual de médicos americanos | - | - | - |
| **Williams** | **2009** | **Evaluar cómo afecta el pensamiento irracional a la adherencia al tratamiento de pacientes con nefropatía diabética** | **El pensamiento irracional desempeña un peso relevante en la adherencia al tratamiento** | **Materiales**  **Entrevistas en profundidad de 45-90 minutos**  **Procedimiento**  **Registro, transcripción y análisis** | **Muestra de conveniencia de 23 pacientes reclutados** | **Clínicas ambulatorias de Nefrología en Australia** | **23 registros** | **-** | **-** |
| **Stiegler** | **2012** | **Observar la prevalencia de 9 errores cognitivos seleccionados en situaciones simuladas de emergencia en Anestesiología** | **Aunque los errores cognitivos pueden conducir al error han tenido escaso estudio en anestesiología** | **Materiales**  **Catálogo de errores adaptado a la práctica de la Anestesiología**  **Escenarios simulados ( Sim Man simulator)**  **Procedimientos**  **Creación de un catálogo de errores cognitivos en Anestesiología**  **Observación y registro del tipo de error en escenarios simulados dentro de un programa formativo para residentes** | **32 residentes voluntarios** | **Departamento de Anestesia. Irvine School of Medicine ( California)** | **38 encuentros simulados** | **-** | **-** |

**4.- Heurísticos y sesgos de Representatividad.**

| **AUTOR** | **AÑO** | **DESCRIPCIÓN** | **POR QUÉ** | **QUÉ Y CÓMO**  (MATERIALES Y PROCEDIMIENTOS) | **QUIÉN** | **DONDE** | **CUANDO Y CUANTO** | **ADAPTACIONES** | **EN QUE GRADO SE REALIZÓ LO PREVISTO** |
| --- | --- | --- | --- | --- | --- | --- | --- | --- | --- |
| Brannon | 2003 | Evaluar la hipótesis de que el heurístico de representatividad influye en la decisión de atención enfermera | Los heurísticos pueden influir en el proceso de decisión realizado por profesionales de enfermería | Material  2 casos de pacientes hipotéticos  Procedimiento  Lectura y resolución del caso | 182 enfermeras y estudiantes de enfermería voluntarias | Estados Unidos |  |  |  |
| Cioffi | 1997 | Examinar la relación entre el uso de heurísticos y la complejidad de la tarea | Existe escaso conocimiento sobre el uso y efecto de heurístico en la toma de decisiones por parte de matronas | Material  2 casos de pacientes obtenidos a partir de datos reales  Protocolos verbales empleando la técnica de “thinking aloud”  Procedimientos  Registro de protocolos verbales sobre los casos  Análisis por 2 evaluadores | 30 matronas voluntarias de diversos niveles de experiencia | Unidades obstétricas de hospitales universitarios y de distrito de Australia | 60 casos |  |  |
| Ferrario | 2003 | Comparar el uso de heurísticos por parte de expertos y juniors | Es escasamente conocido el uso de heurísticos en función del grado de experiencia | Material  Simulaciones obtenidas del Clinical Inference Vignettes  for Community Health Nurses  Procedimientos  Realización de la simulación y análisis de los datos | Muestra aleatorizada de 620 del total de 21577 miembros, de las que se emplearon finalmente 219 de diferentes nivel de experiencia | Sociedad de Enfermeras de Emergencias (Emergency Nurse Association) | 219 casos |  |  |
| Garb | 1996 | Describir cómo realizan los juicios clínicos los psicólogos | Existen escasos estudios sobre el proceso de decisión de psicólogos | Materiales  Casos hipotéticos obtenidos de la literatura  Procedimientos  Lectura de casos  Cumplimentación de registros | 151 psicólogos de diferente grado de experiencia | Selección aleatoria de 8 centros de la Administración de Veteranos con programas de formación de la American Psychological Association | 67 cuestionarios |  |  |
| Kline | 2017 | Medir la dirección y magnitud del impacto causado por el paciente en las decisiones del médico respecto a la realización de pruebas diagnósticas | La visualización de la cara de los pacientes podría influir en la decisión sobre su atención | Materiales  Videos  Procedimientos  Visionado de videos y cumplimentación de cuestionarios | 50 médicos | 3 hospitales afiliados a Indiana University | 50 casos |  |  |
| Kostopoulou | 2016 | Medir la asociación entre la primera impresión y el diagnóstico consiguiente | La primera impresión puede influir de forma relevante en el proceso de atención y decisión | Material  Consultas simuladas on line  Procedimientos  Visualización de 6 pacientes, 3 de ellos con probable diagnóstico de cáncer | 90 médicos de Familia | Clínicas en Londres suroeste de Inglaterra | 297 verbalizaciones |  |  |
| **Cioffi** | **2001** | **Analizar el empleo de experiencias pasadas en el proceso de decisión en urgencias, y cómo se utilizan para construir heurísticos** | **El uso de las experiencias pasadas a través de heurísticos es esperable que se emplee en el proceso de decisión clínica** | **Materiales:**  **Entrevistas no estructuradas de 45 minutos de duración**  **Procedimiento**  **Grabación y transcripción extrayendo referencias a experiencias previas y categorizándolas en los diferentes heurísticos** | **32 enfermeras con al menos 5 años de experiencia** | **Ritchmond ( Australia)** | **Entrevistas a personal de enfermería responsables de 4 salas en hospital docente y 3 de un hospital periférico de un Área de Servicios de salud** |  |  |
| **Kenen** | **2003** | **Evaluar si las personas con antecedentes familiares de cáncer de ovario y mama (HBCO) que buscan consejo genético son influidas por historias familiares y el uso de heurísticos a la hora de interpretar la información** | **La valoración del riesgo de enfermedad ( cáncer) puede estar determinado por el uso de heurísticos** | **Material**  **Entrevistas en profundidad**  **Observación clínica durante 5 meses**  **Procedimientos**  **Trascripción y lecturas reiteradas de las entrevistas** | **Muestra intencional de 21 mujeres de 32 contactadas** | **Mujeres que acuden a unidades de genética por vez primera en un centro de investigación clínica de Reino Unido** | **21 entrevistas** |  |  |

1. En negrita se señalan los estudios que analizan más de un heurístico o sesgo [↑](#footnote-ref-1)
2. La información aportada en la mayor parte de los estudios fue insuficiente para cumplimentar este aspecto [↑](#footnote-ref-2)
3. La información aportada en la mayor parte de los estudios fue insuficiente para cumplimentar este aspecto [↑](#footnote-ref-3)
